# Supplementary material
Source: PubMed Central journal article supplement (PMC4174341)
Supplement: NIHMS602366-supplement-1.pdf [file NIHMS602366-supplement-1.pdf]

Supplementary Table S1

| Obs | SNP       | link to dbSNP             | position | adjusted p*<br>(additive) | adjusted** p<br>(additive) | adjusted**¶<br>p (additive) | adjusted ** p<br>(dominance) | adjusted**p<br>(over-domi<br>nance) |
|-----|-----------|---------------------------|----------|---------------------------|----------------------------|-----------------------------|------------------------------|-------------------------------------|
| 1   | rs2894066 | <a href="#">rs2894066</a> | 29001906 | 0.6816                    | 0.8856                     | 0.9261                      | 0.6423                       | 0.4679                              |
| 2   | rs2071788 | <a href="#">rs2071788</a> | 29020286 | 0.0842                    | 0.255                      | 0.3084                      | 0.2326                       | 0.2409                              |
| 3   | rs763009  | <a href="#">rs763009</a>  | 29023087 | 0.4896                    | 0.568                      | 0.569                       | 0.3587                       | 0.4338                              |
| 4   | rs9257425 | <a href="#">rs9257425</a> | 29044535 | 0.9911                    | 0.7098                     | 0.6664                      | 0.917                        | 0.4565                              |
| 5   | rs6456879 | <a href="#">rs6456879</a> | 29070583 | 0.7298                    | 0.7538                     | 0.67                        | 0.7467                       | 0.7596                              |
| 6   | rs6930903 | <a href="#">rs6930903</a> | 29089223 | 0.3265                    | 0.5202                     | 0.5665                      | 0.9236                       | 0.5211                              |
| 7   | rs3129106 | <a href="#">rs3129106</a> | 29189140 | 0.669                     | 0.7902                     | 0.7829                      | 0.6727                       | 0.575                               |
| 8   | rs3130720 | <a href="#">rs3130720</a> | 29223727 | 0.6783                    | 0.8506                     | 0.8551                      | 0.7894                       | 0.4396                              |
| 9   | rs2394520 | <a href="#">rs2394520</a> | 29245199 | 0.8217                    | 0.8126                     | 0.7592                      | 0.9815                       | 0.7831                              |
| 10  | rs3129171 | <a href="#">rs3129171</a> | 29263728 | 0.6418                    | 0.8013                     | 0.8626                      | 0.654                        | 0.5444                              |
| 11  | rs3116830 | <a href="#">rs3116830</a> | 29275554 | 0.4309                    | 0.4821                     | 0.4859                      | 0.8661                       | 0.6553                              |
| 12  | rs2394546 | <a href="#">rs2394546</a> | 29283578 | 0.7921                    | 0.6946                     | 0.7402                      | 0.7233                       | 0.7905                              |
| 13  | rs3130814 | <a href="#">rs3130814</a> | 29304160 | 0.8788                    | 0.8299                     | 0.872                       | 0.613                        | 0.5123                              |
| 14  | rs3129105 | <a href="#">rs3129105</a> | 29321049 | 0.8655                    | 0.7063                     | 0.6917                      | 0.3393                       | 0.2443                              |
| 15  | rs7774255 | <a href="#">rs7774255</a> | 29382335 | 0.674                     | 0.7449                     | 0.7266                      | 0.3055                       | 0.1643                              |
| 16  | rs9257694 | <a href="#">rs9257694</a> | 29382465 | 0.5758                    | 0.5617                     | 0.5472                      | 0.4656                       | 0.6297                              |
| 17  | rs9393954 | <a href="#">rs9393954</a> | 29390330 | 0.2355                    | 0.4129                     | 0.4836                      | 0.4061                       | 0.4425                              |
| 18  | rs720831  | <a href="#">rs720831</a>  | 29392497 | 0.8091                    | 0.8827                     | 0.9449                      | 0.7804                       | 0.7235                              |
| 19  | rs3130805 | <a href="#">rs3130805</a> | 29414435 | 0.1519                    | 0.1745                     | 0.1755                      | 0.4737                       | 0.9147                              |
| 20  | rs2144425 | <a href="#">rs2144425</a> | 29452918 | 0.3268                    | 0.2071                     | 0.2475                      | 0.883                        | 0.0991                              |
| 21  | rs238880  | <a href="#">rs238880</a>  | 29455023 | 0.3886                    | 0.3021                     | 0.3572                      | 0.9973                       | 0.1199                              |
| 22  | rs238872  | <a href="#">rs238872</a>  | 29459852 | 0.2071                    | 0.1591                     | 0.2281                      | 0.0908                       | 0.2449                              |
| 23  | rs2073154 | <a href="#">rs2073154</a> | 29472794 | 0.3464                    | 0.3555                     | 0.3178                      | 0.537                        | 0.862                               |
| 24  | rs7754054 | <a href="#">rs7754054</a> | 29500482 | 0.5919                    | 0.795                      | 0.694                       | 0.3804                       | 0.1542                              |
| 25  | rs2074469 | <a href="#">rs2074469</a> | 29515949 | 0.5462                    | 0.4491                     | 0.4895                      | 0.7321                       | 0.8049                              |
| 26  | rs2523442 | <a href="#">rs2523442</a> | 29525796 | 0.5791                    | 0.4473                     | 0.4969                      | 0.2267                       | 0.1314                              |
| 27  | rs3094574 | <a href="#">rs3094574</a> | 29530071 | 0.4987                    | 0.73                       | 0.6789                      | 0.2588                       | 0.1209                              |
| 28  | rs757256  | <a href="#">rs757256</a>  | 29580895 | 0.7845                    | 0.4913                     | 0.5318                      | 0.188                        | 0.134                               |
| 29  | rs3094572 | <a href="#">rs3094572</a> | 29588972 | 0.6094                    | 0.8687                     | 0.8106                      | 0.558                        | 0.3907                              |
| 30  | rs2745409 | <a href="#">rs2745409</a> | 29609903 | 0.9623                    | 0.8407                     | 0.8494                      | 0.7935                       | 0.8446                              |
| 31  | rs3094576 | <a href="#">rs3094576</a> | 29624221 | 0.7953                    | 0.9861                     | 0.943                       | 0.8771                       | 0.739                               |
| 32  | rs2534790 | <a href="#">rs2534790</a> | 29632147 | 0.3754                    | 0.2447                     | 0.277                       | 0.196                        | 0.2509                              |
| 33  | rs388234  | <a href="#">rs388234</a>  | 29641274 | 0.3328                    | 0.444                      | 0.4321                      | 0.7589                       | 0.6274                              |
| 34  | rs1003581 | <a href="#">rs1003581</a> | 29648183 | 0.5521                    | 0.9227                     | 0.9216                      | 0.7195                       | 0.5329                              |
| 35  | rs1233391 | <a href="#">rs1233391</a> | 29658597 | 0.2734                    | 0.5167                     | 0.559                       | 0.599                        | 0.7676                              |
| 36  | rs1233386 | <a href="#">rs1233386</a> | 29666169 | 0.766                     | 0.7813                     | 0.8387                      | 0.8641                       | 0.9776                              |
| 37  | rs740882  | <a href="#">rs740882</a>  | 29683435 | 0.5476                    | 0.3443                     | 0.3464                      | 0.4916                       | 0.7259                              |
| 38  | rs29230   | <a href="#">rs29230</a>   | 29684372 | 0.176                     | 0.2774                     | 0.2786                      | 0.4337                       | 0.7274                              |
| 39  | rs3095267 | <a href="#">rs3095267</a> | 29715025 | 0.4982                    | 0.6198                     | 0.6104                      | 0.8059                       | 0.2699                              |
| 40  | rs29273   | <a href="#">rs29273</a>   | 29718968 | 0.2651                    | 0.2344                     | 0.2223                      | 0.203                        | 0.2169                              |
| 41  | rs2252711 | <a href="#">rs2252711</a> | 29734300 | 0.6726                    | 0.7398                     | 0.7569                      | 0.6818                       | 0.6766                              |
| 42  | rs2071653 | <a href="#">rs2071653</a> | 29743907 | 0.8645                    | 0.8002                     | 0.8602                      | 0.4021                       | 0.1644                              |
| 43  | rs2747421 | <a href="#">rs2747421</a> | 29753097 | 0.4558                    | 0.6341                     | 0.6756                      | 0.9187                       | 0.6973                              |
| 44  | rs7382153 | <a href="#">rs7382153</a> | 29774090 | 0.4828                    | 0.7632                     | 0.7871                      | 0.5786                       | 0.597                               |
| 45  | rs1476572 | <a href="#">rs1476572</a> | 29782720 | 0.9182                    | 0.7159                     | 0.763                       | 0.4032                       | 0.2304                              |
| 46  | rs2517911 | <a href="#">rs2517911</a> | 29792613 | 0.5392                    | 0.7484                     | 0.7351                      | 0.869                        | 0.4624                              |
| 47  | rs1362126 | <a href="#">rs1362126</a> | 29798998 | 0.283                     | 0.3188                     | 0.3138                      | 0.2326                       | 0.4151                              |
| 48  | rs1736926 | <a href="#">rs1736926</a> | 29800541 | 0.6061                    | 0.7874                     | 0.8535                      | 0.9364                       | 0.8738                              |
| 49  | rs1628578 | <a href="#">rs1628578</a> | 29803481 | 0.5857                    | 0.7807                     | 0.7671                      | 0.8276                       | 0.4282                              |
| 50  | rs1610601 | <a href="#">rs1610601</a> | 29808162 | 0.7418                    | 0.9964                     | 0.9897                      | 0.7057                       | 0.4409                              |
| 51  | rs2394160 | <a href="#">rs2394160</a> | 29811241 | 0.5206                    | 0.6615                     | 0.6555                      | 0.9693                       | 0.5901                              |
| 52  | rs1633088 | <a href="#">rs1633088</a> | 29821559 | 0.8228                    | 0.8976                     | 0.9082                      | 0.5149                       | 0.2453                              |
| 53  | rs6921921 | <a href="#">rs6921921</a> | 29863430 | 0.7802                    | 0.8141                     | 0.7524                      | 0.5442                       | 0.3492                              |
| 54  | rs2394694 | <a href="#">rs2394694</a> | 29897978 | 0.291                     | 0.2602                     | 0.2907                      | 0.2655                       | 0.8211                              |
| 55  | rs2735024 | <a href="#">rs2735024</a> | 29900467 | 0.1517                    | 0.0737                     | 0.0861                      | 0.1293                       | 0.6571                              |

|     |            |                            |          |        |        |        |        |        |
|-----|------------|----------------------------|----------|--------|--------|--------|--------|--------|
| 56  | rs1736935  | <a href="#">rs1736935</a>  | 29902422 | 0.291  | 0.2602 | 0.2907 | 0.2655 | 0.8211 |
| 57  | rs1632942  | <a href="#">rs1632942</a>  | 29904619 | 0.2237 | 0.222  | 0.2494 | 0.1974 | 0.7106 |
| 58  | rs1736920  | <a href="#">rs1736920</a>  | 29905152 | 0.291  | 0.2602 | 0.2907 | 0.2655 | 0.8211 |
| 59  | rs915668   | <a href="#">rs915668</a>   | 29906438 | 0.291  | 0.2602 | 0.2907 | 0.2655 | 0.8211 |
| 60  | rs1063320  | <a href="#">rs1063320</a>  | 29906728 | 0.291  | 0.2602 | 0.2907 | 0.2655 | 0.8211 |
| 61  | rs2517892  | <a href="#">rs2517892</a>  | 29909453 | 0.8869 | 0.864  | 0.8577 | 0.971  | 0.8802 |
| 62  | rs3094657  | <a href="#">rs3094657</a>  | 29936289 | 0.6318 | 0.7205 | 0.7949 | 0.8886 | 0.4675 |
| 63  | rs1611732  | <a href="#">rs1611732</a>  | 29938987 | 0.4907 | 0.5477 | 0.53   | 0.7235 | 0.1384 |
| 64  | rs7745413  | <a href="#">rs7745413</a>  | 30023448 | 0.7759 | 0.9966 | 0.9153 | 0.9759 | 0.9451 |
| 65  | rs2844802  | <a href="#">rs2844802</a>  | 30056791 | 0.1301 | 0.2713 | 0.2292 | 0.9307 | 0.1902 |
| 66  | rs356971   | <a href="#">rs356971</a>   | 30087776 | 0.0422 | 0.0597 | 0.0565 | 0.3198 | 0.7934 |
| 67  | rs259939   | <a href="#">rs259939</a>   | 30119560 | 0.2533 | 0.437  | 0.38   | 0.7682 | 0.0999 |
| 68  | rs3807031  | <a href="#">rs3807031</a>  | 30141863 | 0.516  | 0.5389 | 0.495  | 0.4765 | 0.4858 |
| 69  | rs8347     | <a href="#">rs8347</a>     | 30145665 | 0.9842 | 0.8894 | 0.9948 | 0.9354 | 0.7335 |
| 70  | rs1150735  | <a href="#">rs1150735</a>  | 30153178 | 0.1913 | 0.3372 | 0.2894 | 0.7536 | 0.0558 |
| 71  | rs7382061  | <a href="#">rs7382061</a>  | 30155944 | 0.368  | 0.5391 | 0.4972 | 0.2277 | 0.1511 |
| 72  | rs1116221  | <a href="#">rs1116221</a>  | 30179309 | 0.0328 | 0.0457 | 0.0459 | 0.228  | 0.9532 |
| 73  | rs2523989  | <a href="#">rs2523989</a>  | 30186254 | 0.222  | 0.1694 | 0.2042 | 0.2572 | 0.4529 |
| 74  | rs3734838  | <a href="#">rs3734838</a>  | 30188210 | 0.7162 | 0.9271 | 0.9432 | 0.9623 | 0.8443 |
| 75  | rs2523979  | <a href="#">rs2523979</a>  | 30191494 | 0.233  | 0.1698 | 0.2051 | 0.2354 | 0.3869 |
| 76  | rs2857440  | <a href="#">rs2857440</a>  | 30214472 | 0.4577 | 0.6438 | 0.5948 | 0.6389 | 0.6932 |
| 77  | rs3815081  | <a href="#">rs3815081</a>  | 30222053 | 0.8248 | 0.6318 | 0.7    | 0.4407 | 0.3049 |
| 78  | rs2517645  | <a href="#">rs2517645</a>  | 30230602 | 0.8304 | 0.6883 | 0.6888 | 0.8581 | 0.4162 |
| 79  | rs2157678  | <a href="#">rs2157678</a>  | 30236928 | 0.4154 | 0.3125 | 0.3157 | 0.5331 | 0.877  |
| 80  | rs9368624  | <a href="#">rs9368624</a>  | 30243956 | 0.885  | 0.8392 | 0.9096 | 0.534  | 0.2968 |
| 81  | rs757257   | <a href="#">rs757257</a>   | 30250437 | 0.4553 | 0.8715 | 0.8809 | 0.3178 | 0.1217 |
| 82  | rs2284165  | <a href="#">rs2284165</a>  | 30268034 | 0.7841 | 0.5311 | 0.4749 | 0.4117 | 0.3456 |
| 83  | rs6457188  | <a href="#">rs6457188</a>  | 30346863 | 0.1294 | 0.1266 | 0.1652 | 0.1683 | 0.4082 |
| 84  | rs7383543  | <a href="#">rs7383543</a>  | 30360815 | 0.8715 | 0.9454 | 0.9961 | 0.5366 | 0.2535 |
| 85  | rs928823   | <a href="#">rs928823</a>   | 30365825 | 0.398  | 0.725  | 0.7159 | 0.6209 | 0.5307 |
| 86  | rs1264616  | <a href="#">rs1264616</a>  | 30372286 | 0.783  | 0.604  | 0.7106 | 0.6923 | 0.8595 |
| 87  | rs3130380  | <a href="#">rs3130380</a>  | 30387109 | 0.5496 | 0.3779 | 0.381  | 0.6318 | 0.9979 |
| 88  | rs9357097  | <a href="#">rs9357097</a>  | 30393100 | 0.0394 | 0.0511 | 0.0822 | 0.1465 | 0.6062 |
| 89  | rs974962   | <a href="#">rs974962</a>   | 30422586 | 0.6682 | 0.3597 | 0.454  | 0.4303 | 0.5726 |
| 90  | rs9261947  | <a href="#">rs9261947</a>  | 30502607 | 0.0626 | 0.2016 | 0.2048 | 0.1884 | 0.2091 |
| 91  | rs1076832  | <a href="#">rs1076832</a>  | 30527810 | 0.6223 | 0.332  | 0.2936 | 0.9158 | 0.3428 |
| 92  | rs2844729  | <a href="#">rs2844729</a>  | 30530611 | 0.618  | 0.7685 | 0.8287 | 0.4436 | 0.2835 |
| 93  | rs7764934  | <a href="#">rs7764934</a>  | 30542545 | 0.0767 | 0.0349 | 0.0362 | 0.2234 | 0.4828 |
| 94  | rs9295895  | <a href="#">rs9295895</a>  | 30546205 | 0.0722 | 0.0621 | 0.075  | 0.115  | 0.3895 |
| 95  | rs2021720  | <a href="#">rs2021720</a>  | 30557223 | 0.0555 | 0.0238 | 0.0247 | 0.1834 | 0.4793 |
| 96  | rs2157605  | <a href="#">rs2157605</a>  | 30562055 | 0.4143 | 0.3378 | 0.263  | 0.7884 | 0.5603 |
| 97  | rs1264459  | <a href="#">rs1264459</a>  | 30563899 | 0.3826 | 0.2003 | 0.2633 | 0.1048 | 0.0664 |
| 98  | rs1264457  | <a href="#">rs1264457</a>  | 30566043 | 0.362  | 0.0456 | 0.053  | 0.0559 | 0.426  |
| 99  | rs1264456  | <a href="#">rs1264456</a>  | 30570063 | 0.273  | 0.1173 | 0.1162 | 0.0502 | 0.069  |
| 100 | rs2429657  | <a href="#">rs2429657</a>  | 30579499 | 0.0081 | 0.0182 | 0.0147 | 0.0032 | 0.0021 |
| 101 | rs2534816  | <a href="#">rs2534816</a>  | 30606843 | 0.4465 | 0.2178 | 0.221  | 0.1193 | 0.0824 |
| 102 | rs1264419  | <a href="#">rs1264419</a>  | 30684760 | 0.3203 | 0.2196 | 0.1749 | 0.8862 | 0.0432 |
| 103 | rs4713340  | <a href="#">rs4713340</a>  | 30707681 | 0.4639 | 0.159  | 0.1619 | 0.0798 | 0.0555 |
| 104 | rs12665339 | <a href="#">rs12665339</a> | 30709211 | 0.4287 | 0.2463 | 0.2124 | 0.46   | 0.8894 |
| 105 | rs1076829  | <a href="#">rs1076829</a>  | 30735195 | 0.0229 | 0.0275 | 0.0236 | 0.0094 | 0.0367 |
| 106 | rs9262145  | <a href="#">rs9262145</a>  | 30762510 | 0.5092 | 0.2725 | 0.2725 | 0.2164 | 0.2947 |
| 107 | rs3094093  | <a href="#">rs3094093</a>  | 30787607 | 0.5717 | 0.4368 | 0.4395 | 0.2569 | 0.1444 |
| 108 | rs3132584  | <a href="#">rs3132584</a>  | 30796406 | 0.7803 | 0.5547 | 0.6118 | 0.6654 | 0.8524 |
| 109 | rs3094127  | <a href="#">rs3094127</a>  | 30805426 | 0.9458 | 0.6377 | 0.6972 | 0.7705 | 0.9653 |
| 110 | rs8512     | <a href="#">rs8512</a>     | 30819336 | 0.3531 | 0.2907 | 0.2941 | 0.1654 | 0.1127 |
| 111 | rs3130667  | <a href="#">rs3130667</a>  | 30851220 | 0.8777 | 0.7123 | 0.6726 | 0.4311 | 0.2906 |
| 112 | rs4713376  | <a href="#">rs4713376</a>  | 30881293 | 0.7873 | 0.7863 | 0.7861 | 0.7765 | 0.7879 |
| 113 | rs1264362  | <a href="#">rs1264362</a>  | 30884569 | 0.6977 | 0.6044 | 0.607  | 0.7091 | 0.9203 |
| 114 | rs9380197  | <a href="#">rs9380197</a>  | 30886182 | 0.6029 | 0.4562 | 0.4165 | 0.8059 | 0.1208 |

|     |            |                            |          |        |        |        |        |        |
|-----|------------|----------------------------|----------|--------|--------|--------|--------|--------|
| 115 | rs3130649  | <a href="#">rs3130649</a>  | 30911233 | 0.3137 | 0.7534 | 0.8011 | 0.7121 | 0.2818 |
| 116 | rs2535335  | <a href="#">rs2535335</a>  | 30920476 | 0.5228 | 0.817  | 0.7658 | 0.6755 | 0.2933 |
| 117 | rs2844654  | <a href="#">rs2844654</a>  | 30946667 | 0.4044 | 0.8989 | 0.8418 | 0.5119 | 0.1639 |
| 118 | rs9468842  | <a href="#">rs9468842</a>  | 30960726 | 0.431  | 0.0824 | 0.0828 | 0.0692 | 0.0899 |
| 119 | rs1264323  | <a href="#">rs1264323</a>  | 30963886 | 0.3182 | 0.0515 | 0.052  | 0.0247 | 0.0805 |
| 120 | rs11970154 | <a href="#">rs11970154</a> | 31027857 | 0.0902 | 0.127  | 0.1489 | 0.2398 | 0.4981 |
| 121 | rs7450430  | <a href="#">rs7450430</a>  | 31043993 | 0.0355 | 0.0714 | 0.0716 | 0.1964 | 0.8212 |
| 122 | rs2844682  | <a href="#">rs2844682</a>  | 31054127 | 0.2733 | 0.3708 | 0.3246 | 0.5923 | 0.9604 |
| 123 | rs1634722  | <a href="#">rs1634722</a>  | 31087063 | 0.7538 | 0.9577 | 0.8954 | 0.4748 | 0.1402 |
| 124 | rs4713411  | <a href="#">rs4713411</a>  | 31095155 | 0.5343 | 0.4588 | 0.461  | 0.4939 | 0.7769 |
| 125 | rs2517500  | <a href="#">rs2517500</a>  | 31141488 | 0.8707 | 0.9558 | 0.9386 | 0.6031 | 0.3582 |
| 126 | rs7381697  | <a href="#">rs7381697</a>  | 31176005 | 0.5531 | 0.9717 | 0.8267 | 0.9745 | 0.9157 |
| 127 | rs1265059  | <a href="#">rs1265059</a>  | 31186474 | 0.7306 | 0.5895 | 0.6798 | 0.4951 | 0.6741 |
| 128 | rs707913   | <a href="#">rs707913</a>   | 31192766 | 0.7768 | 0.8802 | 0.8679 | 0.6726 | 0.4954 |
| 129 | rs1063646  | <a href="#">rs1063646</a>  | 31215627 | 0.838  | 0.9392 | 0.7915 | 0.9764 | 0.978  |
| 130 | rs1150765  | <a href="#">rs1150765</a>  | 31235541 | 0.9831 | 0.688  | 0.6828 | 0.9846 | 0.648  |
| 131 | rs7750641  | <a href="#">rs7750641</a>  | 31237289 | 0.416  | 0.3755 | 0.3748 | 0.393  | 0.4516 |
| 132 | rs3130933  | <a href="#">rs3130933</a>  | 31240064 | 0.3737 | 0.3697 | 0.4696 | 0.2133 | 0.1254 |
| 133 | rs879882   | <a href="#">rs879882</a>   | 31247431 | 0.5687 | 0.5761 | 0.6059 | 0.7465 | 0.8957 |
| 134 | rs12195455 | <a href="#">rs12195455</a> | 31286985 | 0.3307 | 0.3367 | 0.3808 | 0.2356 | 0.1883 |
| 135 | rs3869109  | <a href="#">rs3869109</a>  | 31292175 | 0.4539 | 0.9891 | 0.9314 | 0.8892 | 0.8183 |
| 136 | rs6904669  | <a href="#">rs6904669</a>  | 31300775 | 0.4207 | 0.5042 | 0.5448 | 0.3387 | 0.3804 |
| 137 | rs2074489  | <a href="#">rs2074489</a>  | 31348107 | 0.8972 | 0.9792 | 0.8672 | 0.749  | 0.539  |
| 138 | rs7759127  | <a href="#">rs7759127</a>  | 31348967 | 0.2654 | 0.7571 | 0.769  | 0.7223 | 0.6976 |
| 139 | rs7382297  | <a href="#">rs7382297</a>  | 31355046 | 0.3453 | 0.3865 | 0.4354 | 0.2824 | 0.2304 |
| 140 | rs7453967  | <a href="#">rs7453967</a>  | 31422222 | 0.0718 | 0.132  | 0.2058 | 0.0862 | 0.0765 |
| 141 | rs2156875  | <a href="#">rs2156875</a>  | 31425326 | 0.3844 | 0.2806 | 0.3336 | 0.6359 | 0.4899 |
| 142 | rs2442719  | <a href="#">rs2442719</a>  | 31428517 | 0.1814 | 0.3503 | 0.4265 | 0.4771 | 0.9722 |
| 143 | rs2523608  | <a href="#">rs2523608</a>  | 31430538 | 0.0879 | 0.2119 | 0.3419 | 0.1317 | 0.2444 |
| 144 | rs2523589  | <a href="#">rs2523589</a>  | 31435313 | 0.9677 | 0.9306 | 0.7639 | 0.7512 | 0.6758 |
| 145 | rs2523554  | <a href="#">rs2523554</a>  | 31439808 | 0.2019 | 0.3738 | 0.4971 | 0.5052 | 0.8958 |
| 146 | rs2523454  | <a href="#">rs2523454</a>  | 31475844 | 0.7251 | 0.6777 | 0.6796 | 0.142  | 0.0182 |
| 147 | rs2523451  | <a href="#">rs2523451</a>  | 31477130 | 0.977  | 0.869  | 0.8727 | 0.2525 | 0.0418 |
| 148 | rs9380254  | <a href="#">rs9380254</a>  | 31486314 | 0.3047 | 0.303  | 0.3044 | 0.1701 | 0.0913 |
| 149 | rs1131896  | <a href="#">rs1131896</a>  | 31487094 | 0.4581 | 0.6866 | 0.5806 | 0.4223 | 0.2583 |
| 150 | rs2853975  | <a href="#">rs2853975</a>  | 31490696 | 0.5579 | 0.5566 | 0.5586 | 0.2419 | 0.096  |
| 151 | rs2848713  | <a href="#">rs2848713</a>  | 31492458 | 0.371  | 0.2901 | 0.2888 | 0.1841 | 0.1179 |
| 152 | rs2596530  | <a href="#">rs2596530</a>  | 31495352 | 0.5416 | 0.4267 | 0.547  | 0.6029 | 0.9449 |
| 153 | rs2844513  | <a href="#">rs2844513</a>  | 31496193 | 0.3403 | 0.3557 | 0.4331 | 0.129  | 0.1765 |
| 154 | rs2523676  | <a href="#">rs2523676</a>  | 31543970 | 0.5929 | 0.6408 | 0.6476 | 0.3783 | 0.2123 |
| 155 | rs2523674  | <a href="#">rs2523674</a>  | 31544768 | 0.515  | 0.8699 | 0.868  | 0.3487 | 0.1575 |
| 156 | rs2523668  | <a href="#">rs2523668</a>  | 31546075 | 0.818  | 0.9873 | 0.9906 | 0.9377 | 0.8871 |
| 157 | rs2516500  | <a href="#">rs2516500</a>  | 31561619 | 0.7125 | 0.9973 | 0.9779 | 0.6365 | 0.342  |
| 158 | rs9267248  | <a href="#">rs9267248</a>  | 31563914 | 0.9772 | 0.812  | 0.7873 | 0.5606 | 0.3984 |
| 159 | rs2395038  | <a href="#">rs2395038</a>  | 31568430 | 0.77   | 0.9951 | 0.8578 | 0.8329 | 0.684  |
| 160 | rs3095235  | <a href="#">rs3095235</a>  | 31571149 | 0.2608 | 0.1861 | 0.2404 | 0.2652 | 0.5    |
| 161 | rs3828914  | <a href="#">rs3828914</a>  | 31573798 | 0.2395 | 0.1358 | 0.1503 | 0.4865 | 0.6217 |
| 162 | rs2855812  | <a href="#">rs2855812</a>  | 31580699 | 0.7031 | 0.7464 | 0.8217 | 0.8073 | 0.9246 |
| 163 | rs3131639  | <a href="#">rs3131639</a>  | 31581525 | 0.5521 | 0.4194 | 0.5097 | 0.6381 | 0.951  |
| 164 | rs3131635  | <a href="#">rs3131635</a>  | 31584113 | 0.705  | 0.6349 | 0.7377 | 0.6087 | 0.6703 |
| 165 | rs2246626  | <a href="#">rs2246626</a>  | 31587105 | 0.5773 | 0.3881 | 0.4413 | 0.8248 | 0.4433 |
| 166 | rs3093993  | <a href="#">rs3093993</a>  | 31598704 | 0.0976 | 0.2063 | 0.2863 | 0.1238 | 0.1154 |
| 167 | rs3093986  | <a href="#">rs3093986</a>  | 31601400 | 0.1576 | 0.112  | 0.1663 | 0.0884 | 0.1117 |
| 168 | rs2239528  | <a href="#">rs2239528</a>  | 31618084 | 0.523  | 0.3209 | 0.4265 | 0.4413 | 0.7699 |
| 169 | rs2071594  | <a href="#">rs2071594</a>  | 31620699 | 0.022  | 0.0224 | 0.0312 | 0.0577 | 0.3859 |
| 170 | rs2071592  | <a href="#">rs2071592</a>  | 31623319 | 0.0063 | 0.0099 | 0.0141 | 0.0224 | 0.1995 |
| 171 | rs2255798  | <a href="#">rs2255798</a>  | 31629281 | 0.2347 | 0.3049 | 0.3603 | 0.2693 | 0.2708 |
| 172 | rs6929796  | <a href="#">rs6929796</a>  | 31630648 | 0.0444 | 0.0317 | 0.0368 | 0.0592 | 0.1871 |
| 173 | rs2857605  | <a href="#">rs2857605</a>  | 31632830 | 0.2503 | 0.2164 | 0.2445 | 0.2585 | 0.4275 |

|     |            |                            |          |        |        |        |        |        |
|-----|------------|----------------------------|----------|--------|--------|--------|--------|--------|
| 174 | rs2239707  | <a href="#">rs2239707</a>  | 31633298 | 0.0683 | 0.0737 | 0.112  | 0.0647 | 0.1807 |
| 175 | rs2230365  | <a href="#">rs2230365</a>  | 31633427 | 0.645  | 0.6244 | 0.6963 | 0.3472 | 0.1788 |
| 176 | rs3130062  | <a href="#">rs3130062</a>  | 31633891 | 0.6835 | 0.9206 | 0.9148 | 0.891  | 0.8645 |
| 177 | rs4947324  | <a href="#">rs4947324</a>  | 31636109 | 0.9434 | 0.7502 | 0.7511 | 0.9307 | 0.8679 |
| 178 | rs928815   | <a href="#">rs928815</a>   | 31639194 | 0.2372 | 0.1147 | 0.1561 | 0.1746 | 0.7447 |
| 179 | rs3131637  | <a href="#">rs3131637</a>  | 31643053 | 0.2372 | 0.1147 | 0.1561 | 0.1746 | 0.7447 |
| 180 | rs2844484  | <a href="#">rs2844484</a>  | 31644203 | 0.2611 | 0.122  | 0.1656 | 0.1901 | 0.7775 |
| 181 | rs2009658  | <a href="#">rs2009658</a>  | 31646223 | 0.1692 | 0.2657 | 0.276  | 0.2461 | 0.2625 |
| 182 | rs4647191  | <a href="#">rs4647191</a>  | 31646617 | 0.1943 | 0.4141 | 0.4182 | 0.4141 | 0.4141 |
| 183 | rs2516312  | <a href="#">rs2516312</a>  | 31647414 | 0.8755 | 0.3259 | 0.4451 | 0.3259 | 0.3259 |
| 184 | rs2844482  | <a href="#">rs2844482</a>  | 31647746 | 0.2002 | 0.3111 | 0.276  | 0.2936 | 0.3125 |
| 185 | rs1800683  | <a href="#">rs1800683</a>  | 31648050 | 0.0223 | 0.0237 | 0.0326 | 0.0716 | 0.4967 |
| 186 | rs2239704  | <a href="#">rs2239704</a>  | 31648120 | 0.2372 | 0.1147 | 0.1561 | 0.1746 | 0.7447 |
| 187 | rs909253   | <a href="#">rs909253</a>   | 31648292 | 0.0223 | 0.0238 | 0.0328 | 0.0717 | 0.4959 |
| 188 | rs3093542  | <a href="#">rs3093542</a>  | 31648672 | 0.2943 | 0.4587 | 0.4537 | 0.6203 | 0.8541 |
| 189 | rs1041981  | <a href="#">rs1041981</a>  | 31648763 | 0.0223 | 0.0238 | 0.0328 | 0.0717 | 0.4959 |
| 190 | rs4647196  | <a href="#">rs4647196</a>  | 31649011 | .      | .      | .      | .      | .      |
| 191 | rs3093544  | <a href="#">rs3093544</a>  | 31649758 | 0.9525 | 0.7237 | 0.7165 | 0.7237 | 0.7237 |
| 192 | rs4248157  | <a href="#">rs4248157</a>  | 31650122 | .      | .      | .      | .      | .      |
| 193 | rs1800630  | <a href="#">rs1800630</a>  | 31650455 | 0.1391 | 0.2575 | 0.2673 | 0.2335 | 0.2448 |
| 194 | rs4248160  | <a href="#">rs4248160</a>  | 31650672 | 0.9861 | 0.9871 | 0.9871 | 0.9871 | 0.9871 |
| 195 | rs1800629  | <a href="#">rs1800629</a>  | 31651010 | 0.2392 | 0.3795 | 0.4385 | 0.3258 | 0.3303 |
| 196 | rs3093660  | <a href="#">rs3093660</a>  | 31651385 | .      | .      | .      | .      | .      |
| 197 | rs2228088  | <a href="#">rs2228088</a>  | 31651584 | 0.676  | .      | .      | .      | .      |
| 198 | rs3093662  | <a href="#">rs3093662</a>  | 31652168 | 0.3235 | 0.7638 | 0.7588 | 0.7638 | 0.7638 |
| 199 | rs11574936 | <a href="#">rs11574936</a> | 31653172 | .      | .      | .      | .      | .      |
| 200 | rs3093665  | <a href="#">rs3093665</a>  | 31653370 | 0.0965 | 0.1521 | 0.1499 | 0.1521 | 0.1521 |
| 201 | rs10947218 | <a href="#">rs10947218</a> | 31653610 | 0.343  | 0.3585 | 0.3593 | 0.3585 | 0.3585 |
| 202 | rs3093666  | <a href="#">rs3093666</a>  | 31653712 | .      | .      | .      | .      | .      |
| 203 | rs3093668  | <a href="#">rs3093668</a>  | 31654474 | 0.9473 | 0.6078 | 0.6106 | 0.6078 | 0.6078 |
| 204 | rs769177   | <a href="#">rs769177</a>   | 31655590 | 0.7437 | 0.9468 | 0.9523 | 0.9468 | 0.9468 |
| 205 | rs4248165  | <a href="#">rs4248165</a>  | 31656507 | .      | .      | .      | .      | .      |
| 206 | rs3093555  | <a href="#">rs3093555</a>  | 31656869 | .      | .      | .      | .      | .      |
| 207 | rs3093554  | <a href="#">rs3093554</a>  | 31657386 | 0.9776 | .      | .      | .      | .      |
| 208 | rs2256965  | <a href="#">rs2256965</a>  | 31663109 | 0.1456 | 0.0644 | 0.079  | 0.0339 | 0.1682 |
| 209 | rs2256974  | <a href="#">rs2256974</a>  | 31663371 | 0.0945 | 0.0649 | 0.0737 | 0.1793 | 0.6223 |
| 210 | rs986475   | <a href="#">rs986475</a>   | 31664688 | 0.6481 | 0.9656 | 0.9725 | 0.9365 | 0.8331 |
| 211 | rs11575839 | <a href="#">rs11575839</a> | 31665770 | 0.7334 | 0.9454 | 0.8179 | 0.9454 | 0.9454 |
| 212 | rs2736191  | <a href="#">rs2736191</a>  | 31668889 | 0.98   | 0.3308 | 0.3348 | 0.3308 | 0.3308 |
| 213 | rs12198787 | <a href="#">rs12198787</a> | 31671207 | 0.3637 | 0.3821 | 0.4832 | 0.2253 | 0.1384 |
| 214 | rs2844477  | <a href="#">rs2844477</a>  | 31686751 | 0.0207 | 0.0809 | 0.0787 | 0.0862 | 0.4053 |
| 215 | rs2736182  | <a href="#">rs2736182</a>  | 31691291 | 0.5516 | 0.5678 | 0.7135 | 0.5678 | 0.5678 |
| 216 | rs2269475  | <a href="#">rs2269475</a>  | 31691910 | 0.0865 | 0.0763 | 0.0617 | 0.288  | 0.8929 |
| 217 | rs2857597  | <a href="#">rs2857597</a>  | 31692979 | 0.8043 | 0.9964 | 0.9947 | 0.8533 | 0.6997 |
| 218 | rs1077394  | <a href="#">rs1077394</a>  | 31718363 | 0.1155 | 0.2482 | 0.3077 | 0.6575 | 0.494  |
| 219 | rs3130050  | <a href="#">rs3130050</a>  | 31726740 | 0.7899 | 0.8365 | 0.7719 | 0.8901 | 0.9715 |
| 220 | rs3130617  | <a href="#">rs3130617</a>  | 31735502 | 0.853  | 0.9701 | 0.9613 | 0.8123 | 0.6617 |
| 221 | rs7029     | <a href="#">rs7029</a>     | 31737932 | 0.0022 | 0.013  | 0.0127 | 0.0357 | 0.199  |
| 222 | rs2280800  | <a href="#">rs2280800</a>  | 31754377 | 0.0535 | 0.0474 | 0.0374 | 0.1778 | 0.6323 |
| 223 | rs2242653  | <a href="#">rs2242653</a>  | 31783744 | 0.0578 | 0.0501 | 0.0397 | 0.2046 | 0.7621 |
| 224 | rs1065356  | <a href="#">rs1065356</a>  | 31794987 | 0.0024 | 0.0161 | 0.0152 | 0.0209 | 0.0556 |
| 225 | rs3749953  | <a href="#">rs3749953</a>  | 31821103 | 0.0459 | 0.035  | 0.0262 | 0.0612 | 0.14   |
| 226 | rs2299851  | <a href="#">rs2299851</a>  | 31826581 | 0.0743 | 0.1538 | 0.1188 | 0.1153 | 0.0939 |
| 227 | rs707926   | <a href="#">rs707926</a>   | 31856799 | 0.0323 | 0.0269 | 0.0146 | 0.0211 | 0.028  |
| 228 | rs2075800  | <a href="#">rs2075800</a>  | 31885925 | 0.0443 | 0.2722 | 0.2622 | 0.3996 | 0.8066 |
| 229 | rs2227956  | <a href="#">rs2227956</a>  | 31886251 | 0.9296 | 0.7297 | 0.6788 | 0.7745 | 0.8787 |
| 230 | rs1043618  | <a href="#">rs1043618</a>  | 31891486 | 0.1188 | 0.1821 | 0.1564 | 0.2362 | 0.573  |
| 231 | rs2763979  | <a href="#">rs2763979</a>  | 31902571 | 0.1262 | 0.2164 | 0.1851 | 0.1901 | 0.3045 |
| 232 | rs2471980  | <a href="#">rs2471980</a>  | 31908847 | 0.196  | 0.2801 | 0.2433 | 0.2145 | 0.2666 |

|     |            |                            |          |        |        |        |        |        |
|-----|------------|----------------------------|----------|--------|--------|--------|--------|--------|
| 233 | rs3115673  | <a href="#">rs3115673</a>  | 31918064 | 0.0977 | 0.0591 | 0.0343 | 0.0306 | 0.0218 |
| 234 | rs2242665  | <a href="#">rs2242665</a>  | 31947288 | 0.4033 | 0.6974 | 0.5854 | 0.1927 | 0.0553 |
| 235 | rs3130481  | <a href="#">rs3130481</a>  | 31947735 | 0.2941 | 0.5597 | 0.4628 | 0.2023 | 0.1241 |
| 236 | rs652888   | <a href="#">rs652888</a>   | 31959213 | 0.5777 | 0.9543 | 0.7422 | 0.5482 | 0.2488 |
| 237 | rs486416   | <a href="#">rs486416</a>   | 31964049 | 0.5325 | 0.8734 | 0.8631 | 0.2355 | 0.0334 |
| 238 | rs558702   | <a href="#">rs558702</a>   | 31978305 | 0.7156 | 0.6211 | 0.6194 | 0.7057 | 0.8246 |
| 239 | rs2763982  | <a href="#">rs2763982</a>  | 31980530 | 0.0814 | 0.2545 | 0.243  | 0.4872 | 0.9017 |
| 240 | rs2734335  | <a href="#">rs2734335</a>  | 32001923 | 0.1971 | 0.2864 | 0.2187 | 0.3365 | 0.8565 |
| 241 | rs3020644  | <a href="#">rs3020644</a>  | 32002605 | 0.4272 | 0.6599 | 0.5836 | 0.8444 | 0.8306 |
| 242 | rs7746553  | <a href="#">rs7746553</a>  | 32003952 | 0.3897 | 0.2856 | 0.1984 | 0.2554 | 0.2535 |
| 243 | rs621701   | <a href="#">rs621701</a>   | 32011100 | 0.2868 | 0.42   | 0.4185 | 0.4701 | 0.5514 |
| 244 | rs9332739  | <a href="#">rs9332739</a>  | 32011783 | 0.8535 | 0.8103 | 0.8223 | 0.8103 | 0.8103 |
| 245 | rs4151667  | <a href="#">rs4151667</a>  | 32022003 | 0.992  | 0.9844 | 0.9952 | 0.9844 | 0.9844 |
| 246 | rs4151651  | <a href="#">rs4151651</a>  | 32023593 | 0.2758 | 0.4529 | 0.3347 | 0.4529 | 0.4529 |
| 247 | rs512559   | <a href="#">rs512559</a>   | 32024041 | 0.1663 | 0.2248 | 0.225  | 0.3364 | 0.5229 |
| 248 | rs537160   | <a href="#">rs537160</a>   | 32024379 | 0.2925 | 0.8052 | 0.7962 | 0.2552 | 0.0596 |
| 249 | rs2072634  | <a href="#">rs2072634</a>  | 32025270 | 0.5409 | 0.5286 | 0.5311 | 0.5286 | 0.5286 |
| 250 | rs2072633  | <a href="#">rs2072633</a>  | 32027557 | 0.0975 | 0.5625 | 0.6065 | 0.8102 | 0.7534 |
| 251 | rs4151672  | <a href="#">rs4151672</a>  | 32027809 | 0.992  | 0.9844 | 0.9952 | 0.9844 | 0.9844 |
| 252 | rs550513   | <a href="#">rs550513</a>   | 32028666 | 0.4577 | 0.6427 | 0.6394 | 0.7151 | 0.8062 |
| 253 | rs440454   | <a href="#">rs440454</a>   | 32035321 | 0.7935 | 0.7564 | 0.7633 | 0.898  | 0.5268 |
| 254 | rs474534   | <a href="#">rs474534</a>   | 32046086 | 0.5584 | 0.9053 | 0.9928 | 0.6395 | 0.4083 |
| 255 | rs6941112  | <a href="#">rs6941112</a>  | 32054593 | 0.1731 | 0.7241 | 0.7063 | 0.5243 | 0.4223 |
| 256 | rs389883   | <a href="#">rs389883</a>   | 32055439 | 0.5693 | 0.9362 | 0.9286 | 0.647  | 0.4194 |
| 257 | rs6474     | <a href="#">rs6474</a>     | 32114865 | 0.8196 | 0.501  | 0.5111 | 0.5181 | 0.686  |
| 258 | rs1040312  | <a href="#">rs1040312</a>  | 32115287 | 0.5477 | 0.5106 | 0.3919 | 0.5106 | 0.5106 |
| 259 | rs433061   | <a href="#">rs433061</a>   | 32122806 | 0.8554 | 0.7124 | 0.7102 | 0.7217 | 0.7452 |
| 260 | rs2857009  | <a href="#">rs2857009</a>  | 32127724 | 0.6413 | 0.5927 | 0.6061 | 0.7501 | 0.9445 |
| 261 | rs3130285  | <a href="#">rs3130285</a>  | 32134235 | 0.5479 | 0.4467 | 0.4979 | 0.4029 | 0.4105 |
| 262 | rs1150758  | <a href="#">rs1150758</a>  | 32136127 | 0.5438 | 0.4111 | 0.4137 | 0.4863 | 0.6042 |
| 263 | rs204883   | <a href="#">rs204883</a>   | 32140721 | 0.852  | 0.6051 | 0.5706 | 0.2726 | 0.2074 |
| 264 | rs3749962  | <a href="#">rs3749962</a>  | 32144335 | 0.0084 | 0.0143 | 0.0108 | 0.0229 | 0.0448 |
| 265 | rs1150755  | <a href="#">rs1150755</a>  | 32146528 | 0.5995 | 0.4635 | 0.4656 | 0.5477 | 0.6729 |
| 266 | rs2071295  | <a href="#">rs2071295</a>  | 32146678 | 0.609  | 0.6058 | 0.6194 | 0.7688 | 0.9268 |
| 267 | rs185819   | <a href="#">rs185819</a>   | 32158045 | 0.1241 | 0.2885 | 0.2845 | 0.1106 | 0.182  |
| 268 | rs1150753  | <a href="#">rs1150753</a>  | 32167845 | 0.8583 | 0.715  | 0.7129 | 0.7252 | 0.7494 |
| 269 | rs2071293  | <a href="#">rs2071293</a>  | 32170665 | 0.7526 | 0.448  | 0.4595 | 0.9121 | 0.4649 |
| 270 | rs17421624 | <a href="#">rs17421624</a> | 32174155 | 0.8712 | 0.3593 | 0.3681 | 0.753  | 0.5995 |
| 271 | rs12153855 | <a href="#">rs12153855</a> | 32182782 | 0.8469 | 0.7351 | 0.9191 | 0.8056 | 0.8924 |
| 272 | rs429150   | <a href="#">rs429150</a>   | 32183541 | 0.3344 | 0.6515 | 0.6511 | 0.438  | 0.475  |
| 273 | rs2269426  | <a href="#">rs2269426</a>  | 32184477 | 0.8903 | 0.7061 | 0.6124 | 0.6913 | 0.8157 |
| 274 | rs3807039  | <a href="#">rs3807039</a>  | 32186351 | 0.998  | 0.732  | 0.7518 | 0.7782 | 0.8385 |
| 275 | rs1269852  | <a href="#">rs1269852</a>  | 32188169 | 0.8694 | 0.7297 | 0.7273 | 0.7405 | 0.7648 |
| 276 | rs3213469  | <a href="#">rs3213469</a>  | 32196832 | 0.4138 | 0.9725 | 0.9817 | 0.8748 | 0.7168 |
| 277 | rs4713505  | <a href="#">rs4713505</a>  | 32212979 | 0.5412 | 0.7943 | 0.8022 | 0.829  | 0.9268 |
| 278 | rs1053924  | <a href="#">rs1053924</a>  | 32228693 | 0.8456 | 0.9813 | 0.9576 | 0.644  | 0.3757 |
| 279 | rs3134603  | <a href="#">rs3134603</a>  | 32233980 | 0.6247 | 0.5901 | 0.5961 | 0.61   | 0.6751 |
| 280 | rs3130283  | <a href="#">rs3130283</a>  | 32246523 | 0.9273 | 0.8941 | 0.9622 | 0.9064 | 0.9322 |
| 281 | rs3131297  | <a href="#">rs3131297</a>  | 32248983 | 0.7764 | 0.9697 | 0.8282 | 0.8775 | 0.7216 |
| 282 | rs2269423  | <a href="#">rs2269423</a>  | 32253685 | 0.786  | 0.595  | 0.5469 | 0.8785 | 0.6616 |
| 283 | rs1035798  | <a href="#">rs1035798</a>  | 32259200 | 0.8475 | 0.6244 | 0.5797 | 0.803  | 0.893  |
| 284 | rs204994   | <a href="#">rs204994</a>   | 32262976 | 0.0917 | 0.2006 | 0.1728 | 0.3359 | 0.666  |
| 285 | rs204991   | <a href="#">rs204991</a>   | 32269344 | 0.4687 | 0.4682 | 0.4141 | 0.7222 | 0.9084 |
| 286 | rs2071278  | <a href="#">rs2071278</a>  | 32273422 | 0.8174 | 0.7143 | 0.7874 | 0.6407 | 0.5917 |
| 287 | rs2071287  | <a href="#">rs2071287</a>  | 32278411 | 0.8228 | 0.705  | 0.7059 | 0.7993 | 0.9332 |
| 288 | rs3131296  | <a href="#">rs3131296</a>  | 32280971 | 0.7416 | 0.894  | 0.8122 | 0.9789 | 0.9314 |
| 289 | rs2071286  | <a href="#">rs2071286</a>  | 32287874 | 0.8723 | 0.8307 | 0.835  | 0.9275 | 0.6613 |
| 290 | rs3134798  | <a href="#">rs3134798</a>  | 32292683 | 0.385  | 0.2921 | 0.2857 | 0.6507 | 0.6925 |
| 291 | rs422951   | <a href="#">rs422951</a>   | 32296361 | 0.962  | 0.8425 | 0.8433 | 0.722  | 0.3583 |

|     |            |                            |          |        |        |        |        |        |
|-----|------------|----------------------------|----------|--------|--------|--------|--------|--------|
| 292 | rs520803   | <a href="#">rs520803</a>   | 32296581 | 0.6805 | 0.9029 | 0.9607 | 0.267  | 0.0211 |
| 293 | rs415929   | <a href="#">rs415929</a>   | 32297010 | 0.6805 | 0.9029 | 0.9607 | 0.267  | 0.0211 |
| 294 | rs443198   | <a href="#">rs443198</a>   | 32298384 | 0.9384 | 0.3982 | 0.3498 | 0.4403 | 0.7238 |
| 295 | rs3134931  | <a href="#">rs3134931</a>  | 32298598 | 0.7683 | 0.5961 | 0.7029 | 0.4895 | 0.4666 |
| 296 | rs365053   | <a href="#">rs365053</a>   | 32303966 | 0.0654 | 0.1444 | 0.1831 | 0.1037 | 0.1724 |
| 297 | rs404890   | <a href="#">rs404890</a>   | 32306845 | 0.1541 | 0.2309 | 0.3089 | 0.11   | 0.1575 |
| 298 | rs2849015  | <a href="#">rs2849015</a>  | 32306914 | 0.1765 | 0.2309 | 0.3089 | 0.11   | 0.1575 |
| 299 | rs6929484  | <a href="#">rs6929484</a>  | 32307345 | 0.126  | 0.9874 |        | 0.9874 | 0.9874 |
| 300 | rs3130315  | <a href="#">rs3130315</a>  | 32328663 | 0.4856 | 0.4763 | 0.5086 | 0.7833 | 0.6532 |
| 301 | rs3130332  | <a href="#">rs3130332</a>  | 32339525 | 0.5975 | 0.6526 | 0.6538 | 0.2939 | 0.1199 |
| 302 | rs4713518  | <a href="#">rs4713518</a>  | 32365315 | 0.334  | 0.3863 | 0.4146 | 0.4622 | 0.8093 |
| 303 | rs1003878  | <a href="#">rs1003878</a>  | 32407800 | 0.9765 | 0.6798 | 0.6859 | 0.9975 | 0.6291 |
| 304 | rs9366793  | <a href="#">rs9366793</a>  | 32409267 | 0.372  | 0.521  | 0.5546 | 0.7253 | 0.8535 |
| 305 | rs1033500  | <a href="#">rs1033500</a>  | 32415360 | 0.371  | 0.4592 | 0.491  | 0.5178 | 0.8134 |
| 306 | rs761187   | <a href="#">rs761187</a>   | 32426014 | 0.5895 | 0.7406 | 0.7826 | 0.8255 | 0.9861 |
| 307 | rs6907322  | <a href="#">rs6907322</a>  | 32432923 | 0.3415 | 0.1811 | 0.1842 | 0.2005 | 0.3554 |
| 308 | rs3129934  | <a href="#">rs3129934</a>  | 32444165 | 0.7752 | 0.9651 | 0.8306 | 0.9853 | 0.9274 |
| 309 | rs3129937  | <a href="#">rs3129937</a>  | 32444342 | 0.5844 | 0.3797 | 0.383  | 0.6481 | 0.9088 |
| 310 | rs9268384  | <a href="#">rs9268384</a>  | 32444564 | 0.371  | 0.4592 | 0.491  | 0.5178 | 0.8134 |
| 311 | rs3129941  | <a href="#">rs3129941</a>  | 32445664 | 0.7132 | 0.8706 | 0.9184 | 0.8216 | 0.7975 |
| 312 | rs2050189  | <a href="#">rs2050189</a>  | 32447625 | 0.7855 | 0.6528 | 0.6498 | 0.9792 | 0.6257 |
| 313 | rs2395153  | <a href="#">rs2395153</a>  | 32453573 | 0.2753 | 0.0656 | 0.0453 | 0.2115 | 0.9248 |
| 314 | rs2395157  | <a href="#">rs2395157</a>  | 32456123 | 0.6764 | 0.2278 | 0.1693 | 0.1672 | 0.1749 |
| 315 | rs4424066  | <a href="#">rs4424066</a>  | 32462406 | 0.6499 | 0.2121 | 0.1618 | 0.1942 | 0.4259 |
| 316 | rs1980493  | <a href="#">rs1980493</a>  | 32471193 | 0.7767 | 0.5913 | 0.5974 | 0.4508 | 0.3563 |
| 317 | rs6906730  | <a href="#">rs6906730</a>  | 32487423 | 0.1455 | 0.1124 | 0.1255 | 0.1876 | 0.9669 |
| 318 | rs3135340  | <a href="#">rs3135340</a>  | 32506850 | 0.5515 | 0.6128 | 0.7    | 0.5875 | 0.6573 |
| 319 | rs2395178  | <a href="#">rs2395178</a>  | 32513340 | 0.7719 | 0.3933 | 0.3936 | 0.1164 | 0.041  |
| 320 | rs3129871  | <a href="#">rs3129871</a>  | 32514320 | 0.9613 | 0.2453 | 0.2477 | 0.0979 | 0.0945 |
| 321 | rs14004    | <a href="#">rs14004</a>    | 32515687 | 0.6595 | 0.7493 | 0.7137 | 0.9279 | 0.5616 |
| 322 | rs1041885  | <a href="#">rs1041885</a>  | 32520787 | 0.77   | 0.7486 | 0.7553 | 0.6494 | 0.5796 |
| 323 | rs9296032  | <a href="#">rs9296032</a>  | 32526688 | 0.6071 | 0.505  | 0.5156 | 0.5992 | 0.8935 |
| 324 | rs10947279 | <a href="#">rs10947279</a> | 32529776 | 0.4733 | 0.9971 | 0.9937 | 0.8337 | 0.6711 |
| 325 | rs7747521  | <a href="#">rs7747521</a>  | 32539083 | 0.7305 | 0.7025 | 0.6016 | 0.4366 | 0.276  |
| 326 | rs701831   | <a href="#">rs701831</a>   | 32657379 | 0.545  | 0.4513 | 0.4575 | 0.5551 | 0.7123 |
| 327 | rs9270657  | <a href="#">rs9270657</a>  | 32673999 | 0.9883 | 0.7947 | 0.8385 | 0.8677 | 0.4856 |
| 328 | rs3135005  | <a href="#">rs3135005</a>  | 32693997 | 0.3157 | 0.2425 | 0.2453 | 0.3001 | 0.4182 |
| 329 | rs9271366  | <a href="#">rs9271366</a>  | 32694832 | 0.2881 | 0.219  | 0.2213 | 0.2712 | 0.3843 |
| 330 | rs4639334  | <a href="#">rs4639334</a>  | 32710192 | 0.5462 | 0.5583 | 0.6599 | 0.5793 | 0.6585 |
| 331 | rs2040410  | <a href="#">rs2040410</a>  | 32710676 | 0.6238 | 0.536  | 0.6161 | 0.6384 | 0.7735 |
| 332 | rs6906021  | <a href="#">rs6906021</a>  | 32734289 | 0.5386 | 0.6726 | 0.8403 | 0.7168 | 0.9833 |
| 333 | rs3916765  | <a href="#">rs3916765</a>  | 32793528 | 0.813  | 0.438  | 0.4889 | 0.4577 | 0.4987 |
| 334 | rs5029394  | <a href="#">rs5029394</a>  | 32803060 | 0.8685 | 0.4963 | 0.4767 | 0.8079 | 0.7587 |
| 335 | rs2213571  | <a href="#">rs2213571</a>  | 32827915 | 0.7613 | 0.7941 | 0.7646 | 0.5909 | 0.1746 |
| 336 | rs6918223  | <a href="#">rs6918223</a>  | 32830510 | 0.8675 | 0.6409 | 0.5694 | 0.6016 | 0.1128 |
| 337 | rs9296044  | <a href="#">rs9296044</a>  | 32844122 | 0.3816 | 0.3714 | 0.4226 | 0.0486 | 0.0295 |
| 338 | rs2857205  | <a href="#">rs2857205</a>  | 32852123 | 0.7882 | 0.3809 | 0.4027 | 0.3282 | 0.3971 |
| 339 | rs2621377  | <a href="#">rs2621377</a>  | 32871088 | 0.9135 | 0.5219 | 0.6035 | 0.583  | 0.8719 |
| 340 | rs6899857  | <a href="#">rs6899857</a>  | 32878460 | 0.7602 | 0.8197 | 0.8801 | 0.7228 | 0.7145 |
| 341 | rs6929716  | <a href="#">rs6929716</a>  | 32885118 | 0.9782 | 0.5332 | 0.6286 | 0.5876 | 0.791  |
| 342 | rs11244    | <a href="#">rs11244</a>    | 32888702 | 0.4709 | 0.3515 | 0.3972 | 0.3415 | 0.4944 |
| 343 | rs1894408  | <a href="#">rs1894408</a>  | 32894811 | 0.1141 | 0.5831 | 0.5926 | 0.224  | 0.1408 |
| 344 | rs13501    | <a href="#">rs13501</a>    | 32901501 | 0.4625 | 0.6516 | 0.6981 | 0.9926 | 0.5867 |
| 345 | rs241447   | <a href="#">rs241447</a>   | 32904729 | 0.7199 | 0.1812 | 0.1782 | 0.2132 | 0.4238 |
| 346 | rs4148872  | <a href="#">rs4148872</a>  | 32910785 | 0.2693 | 0.2621 | 0.2952 | 0.114  | 0.0515 |
| 347 | rs241425   | <a href="#">rs241425</a>   | 32912887 | 0.8474 | 0.9922 | 0.9801 | 0.5888 | 0.3277 |
| 348 | rs2071543  | <a href="#">rs2071543</a>  | 32919607 | 0.9478 | 0.8524 | 0.8527 | 0.3727 | 0.11   |
| 349 | rs2071541  | <a href="#">rs2071541</a>  | 32920836 | 0.0124 | 0.0156 | 0.0115 | 0.0191 | 0.034  |
| 350 | rs1800453  | <a href="#">rs1800453</a>  | 32922953 | 0.0136 | 0.0527 | 0.0426 | 0.0657 | 0.1138 |

|     |            |                            |          |        |        |        |        |        |
|-----|------------|----------------------------|----------|--------|--------|--------|--------|--------|
| 351 | rs735883   | <a href="#">rs735883</a>   | 32924032 | 0.4854 | 0.2494 | 0.2518 | 0.4895 | 0.8087 |
| 352 | rs4148880  | <a href="#">rs4148880</a>  | 32926752 | 0.0236 | 0.156  | 0.1557 | 0.2422 | 0.4522 |
| 353 | rs4713600  | <a href="#">rs4713600</a>  | 32930836 | 0.0236 | 0.0533 | 0.0619 | 0.0715 | 0.5464 |
| 354 | rs9276814  | <a href="#">rs9276814</a>  | 32933068 | 0.3703 | 0.1942 | 0.1951 | 0.3968 | 0.9556 |
| 355 | rs9276820  | <a href="#">rs9276820</a>  | 32937254 | 0.014  | 0.0335 | 0.0391 | 0.0354 | 0.4425 |
| 356 | rs1383266  | <a href="#">rs1383266</a>  | 32942710 | 0.0309 | 0.0514 | 0.051  | 0.1131 | 0.4175 |
| 357 | rs6928398  | <a href="#">rs6928398</a>  | 32946247 | 0.1361 | 0.1227 | 0.1249 | 0.2016 | 0.7604 |
| 358 | rs2857218  | <a href="#">rs2857218</a>  | 32963318 | 0.1857 | 0.1224 | 0.123  | 0.6781 | 0.2251 |
| 359 | rs2187688  | <a href="#">rs2187688</a>  | 32979979 | 0.0199 | 0.0083 | 0.0083 | 0.0412 | 0.9156 |
| 360 | rs241398   | <a href="#">rs241398</a>   | 32983428 | 0.1331 | 0.055  | 0.0469 | 0.1726 | 0.9071 |
| 361 | rs154977   | <a href="#">rs154977</a>   | 33007996 | 0.5086 | 0.6535 | 0.7424 | 0.3772 | 0.2264 |
| 362 | rs181997   | <a href="#">rs181997</a>   | 33008696 | 0.896  | 0.986  | 0.8475 | 0.2489 | 0.0229 |
| 363 | rs3129299  | <a href="#">rs3129299</a>  | 33008765 | 0.527  | 0.7766 | 0.8531 | 0.2794 | 0.0621 |
| 364 | rs1465651  | <a href="#">rs1465651</a>  | 33009329 | 0.1082 | 0.1038 | 0.0661 | 0.2374 | 0.5566 |
| 365 | rs10751    | <a href="#">rs10751</a>    | 33010561 | 0.1955 | 0.1016 | 0.0646 | 0.2758 | 0.7069 |
| 366 | rs68600    | <a href="#">rs68600</a>    | 33011702 | 0.4515 | 0.3079 | 0.3384 | 0.2765 | 0.6119 |
| 367 | rs151719   | <a href="#">rs151719</a>   | 33011878 | 0.0291 | 0.0179 | 0.0165 | 0.0251 | 0.1005 |
| 368 | rs2071556  | <a href="#">rs2071556</a>  | 33012579 | 0.8401 | 0.529  | 0.5349 | 0.7946 | 0.1495 |
| 369 | rs1042337  | <a href="#">rs1042337</a>  | 33012959 | 0.6312 | 0.9218 | 0.9758 | 0.6389 | 0.3961 |
| 370 | rs194675   | <a href="#">rs194675</a>   | 33013724 | 0.0383 | 0.028  | 0.0321 | 0.1263 | 0.7455 |
| 371 | rs714289   | <a href="#">rs714289</a>   | 33013789 | 0.5999 | 0.5316 | 0.5255 | 0.5316 | 0.5316 |
| 372 | rs6902982  | <a href="#">rs6902982</a>  | 33015859 | 0.0003 | 0.0004 | 0.0004 | 0.0004 | 0.0004 |
| 373 | rs3101944  | <a href="#">rs3101944</a>  | 33019105 | 0.1621 | 0.4632 | 0.4472 | 0.3914 | 0.3483 |
| 374 | rs194682   | <a href="#">rs194682</a>   | 33022591 | 0.0984 | 0.0387 | 0.0387 | 0.0616 | 0.3733 |
| 375 | rs10679    | <a href="#">rs10679</a>    | 33024533 | 0.7411 | 0.6639 | 0.6594 | 0.5941 | 0.5311 |
| 376 | rs1063478  | <a href="#">rs1063478</a>  | 33025522 | 0.0834 | 0.2282 | 0.2758 | 0.1439 | 0.1069 |
| 377 | rs209475   | <a href="#">rs209475</a>   | 33033563 | 0.0533 | 0.0212 | 0.021  | 0.0279 | 0.2365 |
| 378 | rs580962   | <a href="#">rs580962</a>   | 33033670 | 0.6441 | 0.462  | 0.4678 | 0.8054 | 0.585  |
| 379 | rs683208   | <a href="#">rs683208</a>   | 33045879 | 0.0539 | 0.0173 | 0.0173 | 0.0367 | 0.3895 |
| 380 | rs592625   | <a href="#">rs592625</a>   | 33080668 | 0.0827 | 0.0657 | 0.0686 | 0.1444 | 0.4532 |
| 381 | rs2284191  | <a href="#">rs2284191</a>  | 33084632 | 0.5155 | 0.4031 | 0.4639 | 0.4227 | 0.4932 |
| 382 | rs403414   | <a href="#">rs403414</a>   | 33085293 | 0.7382 | 0.4989 | 0.3932 | 0.5614 | 0.7252 |
| 383 | rs6911639  | <a href="#">rs6911639</a>  | 33086156 | 0.8339 | 0.9457 | 0.8423 | 0.7307 | 0.4295 |
| 384 | rs429916   | <a href="#">rs429916</a>   | 33086565 | 0.6131 | 0.2609 | 0.3232 | 0.2814 | 0.3092 |
| 385 | rs2395305  | <a href="#">rs2395305</a>  | 33093354 | 0.1434 | 0.0962 | 0.0818 | 0.2086 | 0.8953 |
| 386 | rs419434   | <a href="#">rs419434</a>   | 33094727 | 0.1943 | 0.1713 | 0.2323 | 0.1713 | 0.1713 |
| 387 | rs3130607  | <a href="#">rs3130607</a>  | 33095255 | 0.7952 | 0.6565 | 0.5235 | 0.3874 | 0.2046 |
| 388 | rs12174395 | <a href="#">rs12174395</a> | 33122296 | 0.027  | 0.0084 | 0.01   | 0.035  | 0.6104 |
| 389 | rs375912   | <a href="#">rs375912</a>   | 33124706 | 0.0319 | 0.0107 | 0.0127 | 0.0427 | 0.6258 |
| 390 | rs412735   | <a href="#">rs412735</a>   | 33132110 | 0.7445 | 0.8897 | 0.8348 | 0.7739 | 0.7037 |
| 391 | rs435549   | <a href="#">rs435549</a>   | 33132251 | 0.693  | 0.451  | 0.4953 | 0.1861 | 0.0706 |
| 392 | rs588997   | <a href="#">rs588997</a>   | 33136695 | 0.6784 | 0.7888 | 0.79   | 0.9882 | 0.7248 |
| 393 | rs3077     | <a href="#">rs3077</a>     | 33141000 | 0.1472 | 0.0775 | 0.1091 | 0.2656 | 0.8933 |
| 394 | rs6914849  | <a href="#">rs6914849</a>  | 33148693 | 0.3102 | 0.1572 | 0.2132 | 0.4927 | 0.7421 |
| 395 | rs1431399  | <a href="#">rs1431399</a>  | 33149012 | 0.3425 | 0.1572 | 0.2132 | 0.4927 | 0.7421 |
| 396 | rs3097671  | <a href="#">rs3097671</a>  | 33155590 | 0.6163 | 0.6087 | 0.6034 | 0.7109 | 0.889  |
| 397 | rs9277535  | <a href="#">rs9277535</a>  | 33162839 | 0.1385 | 0.1429 | 0.1629 | 0.1258 | 0.2472 |
| 398 | rs3117223  | <a href="#">rs3117223</a>  | 33168042 | 0.1336 | 0.1877 | 0.214  | 0.3596 | 0.8385 |
| 399 | rs3130215  | <a href="#">rs3130215</a>  | 33182941 | 0.7677 | 0.7878 | 0.829  | 0.8749 | 0.9348 |
| 400 | rs7750683  | <a href="#">rs7750683</a>  | 33218812 | 0.7008 | 0.9553 | 0.994  | 0.6802 | 0.3981 |
| 401 | rs1003979  | <a href="#">rs1003979</a>  | 33222149 | 0.7649 | 0.8655 | 0.9049 | 0.9192 | 0.9712 |
| 402 | rs3762013  | <a href="#">rs3762013</a>  | 33250517 | 0.2011 | 0.579  | 0.6222 | 0.6618 | 0.9562 |
| 403 | rs2855425  | <a href="#">rs2855425</a>  | 33252351 | 0.2857 | 0.4174 | 0.501  | 0.6867 | 0.8471 |
| 404 | rs2744505  | <a href="#">rs2744505</a>  | 33261100 | 0.2927 | 0.7643 | 0.7601 | 0.8669 | 0.9967 |
| 405 | rs1547387  | <a href="#">rs1547387</a>  | 33277873 | 0.3941 | 0.6496 | 0.8146 | 0.3575 | 0.168  |
| 406 | rs365339   | <a href="#">rs365339</a>   | 33280883 | 0.4321 | 0.4894 | 0.5307 | 0.736  | 0.8623 |
| 407 | rs213220   | <a href="#">rs213220</a>   | 33310618 | 0.4981 | 0.6714 | 0.6996 | 0.8674 | 0.3623 |
| 408 | rs461338   | <a href="#">rs461338</a>   | 33326158 | 0.0152 | 0.0157 | 0.0121 | 0.0085 | 0.0114 |
| 409 | rs213202   | <a href="#">rs213202</a>   | 33340033 | 0.811  | 0.4788 | 0.4087 | 0.5487 | 0.8014 |

|     |            |                            |          |        |        |        |        |        |
|-----|------------|----------------------------|----------|--------|--------|--------|--------|--------|
| 410 | rs469064   | <a href="#">rs469064</a>   | 33358454 | 0.6113 | 0.6173 | 0.6248 | 0.756  | 0.8774 |
| 411 | rs466384   | <a href="#">rs466384</a>   | 33362643 | 0.0132 | 0.0135 | 0.0136 | 0.006  | 0.0066 |
| 412 | rs1059288  | <a href="#">rs1059288</a>  | 33375650 | 0.6912 | 0.6139 | 0.6269 | 0.6771 | 0.9435 |
| 413 | rs2071888  | <a href="#">rs2071888</a>  | 33380833 | 0.7275 | 0.6447 | 0.6594 | 0.6711 | 0.8843 |
| 414 | rs2282851  | <a href="#">rs2282851</a>  | 33388287 | 0.3592 | 0.57   | 0.6106 | 0.7906 | 0.8386 |
| 415 | rs1061801  | <a href="#">rs1061801</a>  | 33390316 | 0.0288 | 0.0371 | 0.0447 | 0.045  | 0.1217 |
| 416 | rs2239839  | <a href="#">rs2239839</a>  | 33396053 | 0.3341 | 0.5343 | 0.5738 | 0.7378 | 0.8954 |
| 417 | rs2073524  | <a href="#">rs2073524</a>  | 33398525 | 0.3784 | 0.2149 | 0.218  | 0.2183 | 0.6263 |
| 418 | rs3130267  | <a href="#">rs3130267</a>  | 33414772 | 0.6527 | 0.5748 | 0.586  | 0.7596 | 0.8095 |
| 419 | rs3130010  | <a href="#">rs3130010</a>  | 33426549 | 0.3502 | 0.6169 | 0.6493 | 0.9083 | 0.6309 |
| 420 | rs211474   | <a href="#">rs211474</a>   | 33428591 | 0.3479 | 0.9084 | 0.9822 | 0.389  | 0.06   |
| 421 | rs3117324  | <a href="#">rs3117324</a>  | 33432505 | 0.1891 | 0.6343 | 0.6745 | 0.2282 | 0.0901 |
| 422 | rs3130276  | <a href="#">rs3130276</a>  | 33444908 | 0.2503 | 0.6394 | 0.6241 | 0.7577 | 0.2321 |
| 423 | rs465506   | <a href="#">rs465506</a>   | 33466986 | 0.3232 | 0.5965 | 0.5309 | 0.953  | 0.4262 |
| 424 | rs376006   | <a href="#">rs376006</a>   | 33478752 | 0.268  | 0.7209 | 0.6495 | 0.7478 | 0.2841 |
| 425 | rs211456   | <a href="#">rs211456</a>   | 33497359 | 0.4956 | 0.7354 | 0.9164 | 0.4647 | 0.0661 |
| 426 | rs7748370  | <a href="#">rs7748370</a>  | 33572039 | 0.8576 | 0.6766 | 0.741  | 0.7535 | 0.2575 |
| 427 | rs769051   | <a href="#">rs769051</a>   | 33581872 | 0.7605 | 0.8533 | 0.9599 | 0.5582 | 0.1571 |
| 428 | rs210203   | <a href="#">rs210203</a>   | 33619207 | 0.9331 | 0.6144 | 0.7549 | 0.9146 | 0.353  |
| 429 | rs210152   | <a href="#">rs210152</a>   | 33623498 | 0.7506 | 0.7859 | 0.7836 | 0.7689 | 0.3632 |
| 430 | rs210133   | <a href="#">rs210133</a>   | 33644775 | 0.5152 | 0.6093 | 0.6156 | 0.9648 | 0.4524 |
| 431 | rs210142   | <a href="#">rs210142</a>   | 33654815 | 0.6548 | 0.9386 | 0.9377 | 0.7579 | 0.593  |
| 432 | rs525623   | <a href="#">rs525623</a>   | 33780581 | 0.8366 | 0.5695 | 0.5673 | 0.6019 | 0.6551 |
| 433 | rs2281829  | <a href="#">rs2281829</a>  | 33783620 | 0.7344 | 0.7183 | 0.7579 | 0.5694 | 0.5727 |
| 434 | rs747694   | <a href="#">rs747694</a>   | 33844468 | 0.0749 | 0.0187 | 0.0205 | 0.125  | 0.5362 |
| 435 | rs2274459  | <a href="#">rs2274459</a>  | 33870220 | 0.228  | 0.4185 | 0.422  | 0.515  | 0.6937 |
| 436 | rs3828783  | <a href="#">rs3828783</a>  | 33875705 | 0.5122 | 0.3031 | 0.2973 | 0.3455 | 0.4619 |
| 437 | rs2281820  | <a href="#">rs2281820</a>  | 33876875 | 0.1675 | 0.0342 | 0.0322 | 0.0438 | 0.4272 |
| 438 | rs1547668  | <a href="#">rs1547668</a>  | 33883424 | 0.6823 | 0.4358 | 0.4733 | 0.7289 | 0.852  |
| 439 | rs3807050  | <a href="#">rs3807050</a>  | 35620904 | 0.1054 | 0.1033 | 0.101  | 0.3262 | 0.9673 |
| 440 | rs873941   | <a href="#">rs873941</a>   | 35632855 | 0.2612 | 0.5606 | 0.7119 | 0.1478 | 0.034  |
| 441 | rs4713897  | <a href="#">rs4713897</a>  | 35636548 | 0.3796 | 0.5079 | 0.6171 | 0.2146 | 0.0775 |
| 442 | rs3800374  | <a href="#">rs3800374</a>  | 35645384 | 0.4822 | 0.6648 | 0.7872 | 0.3698 | 0.1826 |
| 443 | rs3800373  | <a href="#">rs3800373</a>  | 35650454 | 0.2955 | 0.1266 | 0.1266 | 0.4278 | 0.7341 |
| 444 | rs992105   | <a href="#">rs992105</a>   | 35663161 | 0.6649 | 0.9235 | 0.9889 | 0.468  | 0.1642 |
| 445 | rs7753746  | <a href="#">rs7753746</a>  | 35673400 | 0.7987 | 0.8758 | 0.9411 | 0.6542 | 0.4569 |
| 446 | rs4713899  | <a href="#">rs4713899</a>  | 35677259 | 0.7998 | 0.9643 | 0.9702 | 0.7468 | 0.5381 |
| 447 | rs737054   | <a href="#">rs737054</a>   | 35683465 | 0.5035 | 0.484  | 0.4881 | 0.9585 | 0.4314 |
| 448 | rs3777747  | <a href="#">rs3777747</a>  | 35686980 | 0.6471 | 0.6368 | 0.6878 | 0.8063 | 0.2798 |
| 449 | rs7746850  | <a href="#">rs7746850</a>  | 35712623 | 0.7298 | 0.8514 | 0.9165 | 0.6307 | 0.4382 |
| 450 | rs1360780  | <a href="#">rs1360780</a>  | 35715549 | 0.1943 | 0.0737 | 0.0739 | 0.2686 | 0.9611 |
| 451 | rs4713902  | <a href="#">rs4713902</a>  | 35722004 | 0.4818 | 0.3855 | 0.4237 | 0.912  | 0.3698 |
| 452 | rs6912833  | <a href="#">rs6912833</a>  | 35725563 | 0.215  | 0.354  | 0.4009 | 0.3543 | 0.4529 |
| 453 | rs17614642 | <a href="#">rs17614642</a> | 35729899 | 0.8877 | 0.7892 | 0.7912 | 0.7206 | 0.6659 |
| 454 | rs2092427  | <a href="#">rs2092427</a>  | 35730185 | 0.776  | 0.8093 | 0.9988 | 0.8093 | 0.8093 |
| 455 | rs4713908  | <a href="#">rs4713908</a>  | 35755288 | 0.9397 | 0.6086 | 0.7855 | 0.6086 | 0.6086 |
| 456 | rs6457839  | <a href="#">rs6457839</a>  | 35756808 | 0.158  | 0.2018 | 0.2342 | 0.3347 | 0.7217 |
| 457 | rs10947563 | <a href="#">rs10947563</a> | 35761415 | 0.2192 | 0.3643 | 0.4114 | 0.3665 | 0.467  |
| 458 | rs3800372  | <a href="#">rs3800372</a>  | 35763223 | 0.1895 | 0.1853 | 0.1867 | 0.3009 | 0.6886 |
| 459 | rs7763535  | <a href="#">rs7763535</a>  | 35770084 | 0.1529 | 0.2895 | 0.33   | 0.2769 | 0.3611 |
| 460 | rs943297   | <a href="#">rs943297</a>   | 35775838 | 0.1068 | 0.1722 | 0.1996 | 0.2414 | 0.4963 |
| 461 | rs4713921  | <a href="#">rs4713921</a>  | 35789755 | 0.2183 | 0.3099 | 0.3854 | 0.408  | 0.6856 |
| 462 | rs2766534  | <a href="#">rs2766534</a>  | 35793692 | 0.3846 | 0.4289 | 0.3786 | 0.7768 | 0.6659 |
| 463 | rs12200498 | <a href="#">rs12200498</a> | 35793933 | 0.0706 | 0.0765 | 0.075  | 0.0656 | 0.0895 |
| 464 | rs2766543  | <a href="#">rs2766543</a>  | 35816612 | 0.8537 | 0.873  | 0.7589 | 0.8364 | 0.5288 |
| 465 | rs2766554  | <a href="#">rs2766554</a>  | 35827305 | 0.8912 | 0.7855 | 0.6733 | 0.7132 | 0.8017 |
| 466 | rs6910332  | <a href="#">rs6910332</a>  | 35855086 | 0.9401 | 0.7466 | 0.5631 | 0.9791 | 0.6751 |
| 467 | rs851006   | <a href="#">rs851006</a>   | 36173163 | 0.9193 | 0.9226 | 0.9842 | 0.7573 | 0.4698 |



**Footnote to Table S1**

(\*) Univariate conditional logistic models adjusted for the effects of baseline age, duration and degree of immunosuppression. (\*\*) Full univariate conditional logistic models (adjusted for the effects of baseline age, duration and degree of immunosuppression, and HLA B\*57 and B\*27 alleles). (¶) Full univariate conditional logistic models restricted to individuals of non-Hispanic European descent.

Supplementary Table S2. Association of *HLA-B* alleles with HIV-related Kaposi's sarcoma in a matched case and control study of non-Hispanic European men

| <i>HLA-B</i><br>allele | allele count (%) |            | conditional logistic regression |      |
|------------------------|------------------|------------|---------------------------------|------|
|                        | controls         | cases      | OR ( 95% CI)                    | p    |
| 0702                   | 78 (0.123)       | 96 (0.153) | 1.26 (0.86-1.86)                | ns   |
| 0801                   | 72 (0.113)       | 67 (0.107) | 0.93 (0.61-1.41)                | ns   |
| 0705                   | 0                | 4 (0.006)  | nd                              | -    |
| 0802                   | 3 (0.005)        | 0          | nd                              | -    |
| 1302                   | 9 (0.014)        | 18 (0.029) | 2.08 (0.79-5.45)                | ns   |
| 1401                   | 3 (0.005)        | 12 (0.019) | 4.19 (1.14-15.5)                | 0.03 |
| 1402                   | 13 (0.020)       | 18 (0.029) | 1.75 (0.76-4.03)                | ns   |
| 1501                   | 36 (0.057)       | 43 (0.069) | 1.32 (0.68-2.55)                | ns   |
| 1518                   | 3 (0.005)        | 0          | nd                              | -    |
| 1801                   | 22 (0.035)       | 24 (0.038) | 1.36 (0.70-2.67)                | ns   |
| 2702                   | 3 (0.005)        | 0          | nd                              | -    |
| 2703                   | 4 (0.006)        | 0          | nd                              | -    |
| 2705                   | 24 (0.038)       | 13 (0.021) | 0.37 (0.15-0.94)                | 0.04 |
| 3501                   | 39 (0.061)       | 45 (0.072) | 1.26 (0.75-2.14)                | ns   |
| 3502                   | 9 (0.014)        | 12 (0.019) | 1.08 (0.38-3.06)                | ns   |
| 3503                   | 8 (0.013)        | 13 (0.021) | 1.86 (0.68-5.09)                | ns   |
| 3508                   | 0                | 3 (0.005)  | nd                              | -    |
| 3701                   | 11 (0.017)       | 7 (0.011)  | 0.73 (0.24-2.23)                | ns   |
| 3801                   | 20 (0.031)       | 10 (0.016) | 0.52 (0.22-1.24)                | ns   |
| 3901                   | 8 (0.013)        | 7 (0.011)  | 0.99 (0.35-2.82)                | ns   |
| 3906                   | 7 (0.011)        | 3 (0.005)  | nd                              | -    |
| 4001                   | 32 (0.050)       | 30 (0.048) | 0.98 (0.57-1.71)                | ns   |
| 4002                   | 16 (0.025)       | 8 (0.013)  | 0.54 (0.22-1.36)                | ns   |
| 4102                   | 3 (0.005)        | 0          | nd                              | -    |
| 4402                   | 42 (0.066)       | 44 (0.070) | 1.06 (0.63-1.76)                | ns   |
| 4403                   | 27 (0.043)       | 35 (0.056) | 1.22 (0.68-2.20)                | ns   |
| 4501                   | 3 (0.005)        | 4 (0.006)  | nd                              | -    |
| 4901                   | 10 (0.016)       | 14 (0.022) | 1.15 (0.11-3.18)                | ns   |
| 5001                   | 5 (0.008)        | 4 (0.006)  | nd                              | -    |
| 5101                   | 29 (0.046)       | 25 (0.040) | 0.74 (0.39-1.39)                | ns   |
| 5201                   | 9 (0.014)        | 6 (0.010)  | 0.78 (0.24-2.48)                | ns   |
| 5301                   | 3 (0.005)        | 4 (0.006)  | nd                              | -    |
| 5501                   | 13 (0.020)       | 8 (0.013)  | 0.66 (0.27-1.65)                | ns   |
| 5601                   | 6 (0.009)        | 6 (0.010)  | nd                              | -    |
| 5701                   | 21 (0.033)       | 14 (0.022) | 0.74 (0.36-1.54)                | ns   |
| 5801                   | 9 (0.014)        | 5 (0.008)  | 0.70 (0.21-2.25)                | ns   |

Table S3. Super-haplotype structure of the tumor necrosis factor alpha block in HIV-related Kaposi sarcoma case and control study sample nested in the MACS cohort

| Hap # | MCCD1         | BAT1          | ATP6V1G2      | NFKBIL1       |               |               |               |               |               |               |               | LTA          |               |               |               |               |               | TNF           |               |               |               | LST1          |              | NCR3          | HLA-B | CTRL<br>N=330 | CASE<br>N=330 |
|-------|---------------|---------------|---------------|---------------|---------------|---------------|---------------|---------------|---------------|---------------|---------------|--------------|---------------|---------------|---------------|---------------|---------------|---------------|---------------|---------------|---------------|---------------|--------------|---------------|-------|---------------|---------------|
|       | rs3093993 A>C | rs2239528 G>A | rs2071594 G>C | rs2071592 T>A | rs2255798 C>G | rs6929796 G>A | rs2857605 A>G | rs2239707 A>G | rs2230365 G>A | rs3130062 A>G | rs4947324 G>A | rs928815 C>A | rs2009658 A>G | rs4647191 G>A | rs1800683 G>A | rs2229094 A>G | rs3093542 C>G | rs1799964 A>G | rs1800629 G>A | rs3093662 A>G | rs3093665 A>C | rs3093668 C>G | rs769177 G>A | rs2256965 G>A |       |               |               |
| 4     | C             | A             | .             | .             | .             | G             | G             | .             | G             | .             | A             | .            | .             | .             | .             | .             | .             | .             | .             | .             | .             | .             | A            | .             | 0702  | 0.067         | 0.059         |
| 8     | C             | A             | .             | .             | .             | G             | G             | .             | .             | .             | A             | .            | .             | .             | .             | .             | .             | .             | .             | .             | .             | .             | A            | .             | 0702  | 0.043         | 0.073         |
| 83    | C             | A             | .             | .             | .             | G             | G             | .             | .             | .             | A             | .            | .             | .             | .             | .             | .             | .             | .             | .             | .             | .             | A            | .             | 4001  | 0.014         | 0.016         |
| 3     | .             | C             | A             | .             | .             | .             | .             | .             | .             | .             | .             | .            | .             | A             | .             | .             | .             | .             | A             | .             | .             | .             | .            | .             | 0801  | 0.104         | 0.103         |
| 28    | .             | C             | A             | .             | .             | .             | .             | .             | .             | .             | .             | .            | .             | A             | .             | .             | .             | .             | A             | .             | .             | .             | .            | .             | 4402  | 0.019         | 0.022         |
| 34    | .             | C             | A             | .             | A             | .             | .             | .             | .             | .             | .             | .            | .             | A             | .             | .             | .             | .             | .             | .             | .             | .             | .            | .             | 4402  | 0.036         | 0.025         |
| 97    | .             | C             | A             | .             | A             | .             | .             | .             | .             | .             | .             | .            | .             | A             | .             | .             | .             | .             | .             | .             | .             | .             | .            | .             | 3502  | 0.014         | 0.014         |
| 14    | .             | C             | A             | .             | A             | .             | .             | .             | .             | .             | .             | .            | .             | A             | .             | .             | .             | .             | .             | .             | .             | .             | .            | .             | 1801  | 0.006         | NA            |
| 19    | .             | C             | A             | .             | A             | .             | .             | .             | .             | .             | .             | .            | .             | A             | .             | .             | .             | .             | .             | .             | .             | .             | .            | .             | 2705  | 0.018         | 0.014         |
| 67    | .             | C             | A             | .             | A             | .             | .             | .             | .             | .             | .             | .            | .             | A             | .             | .             | .             | .             | .             | .             | .             | .             | .            | .             | 1501  | 0.016         | 0.015         |
| 44    | .             | C             | A             | .             | A             | .             | .             | .             | .             | .             | .             | .            | .             | A             | .             | .             | .             | .             | .             | .             | .             | .             | .            | .             | 4001  | 0.008         | 0.013         |
| 136   | .             | C             | A             | .             | A             | .             | .             | .             | .             | .             | .             | .            | .             | A             | .             | .             | .             | .             | .             | .             | .             | .             | .            | .             | 3906  | 0.008         | NA            |
| 137   | .             | C             | A             | .             | A             | .             | .             | .             | .             | .             | .             | .            | .             | A             | .             | .             | .             | .             | .             | .             | .             | .             | .            | .             | 3901  | 0.006         | NA            |
| 148   | .             | C             | A             | .             | .             | .             | .             | .             | .             | .             | .             | .            | .             | A             | .             | .             | .             | .             | .             | .             | .             | .             | .            | .             | 4901  | NA            | 0.006         |
| 31    | .             | C             | .             | .             | A             | .             | .             | .             | .             | .             | .             | .            | .             | A             | .             | .             | .             | .             | .             | .             | .             | .             | .            | .             | 4001  | 0.006         | NA            |
| 79    | C             | .             | .             | .             | .             | .             | .             | .             | .             | .             | A             | .            | .             | .             | G             | .             | G             | .             | G             | .             | G             | .             | .            | .             | 5701  | 0.031         | 0.020         |
| ?     | .             | .             | .             | .             | .             | .             | .             | .             | .             | .             | A             | .            | .             | .             | .             | G             | .             | G             | .             | G             | .             | .             | .            | .             | ?     | NA            | NA            |
| 43    | .             | A             | .             | .             | .             | .             | .             | .             | .             | .             | A             | .            | .             | .             | G             | G             | .             | .             | G             | .             | .             | .             | A            | .             | 3501  | 0.020         | 0.019         |
| 118   | .             | .             | .             | .             | .             | .             | .             | .             | .             | .             | A             | .            | .             | .             | G             | .             | .             | G             | .             | C             | .             | .             | A            | .             | 3501  | 0.006         | 0.008         |
| 74    | .             | .             | .             | .             | .             | .             | .             | .             | .             | .             | A             | .            | .             | .             | .             | .             | .             | .             | .             | .             | .             | .             | A            | G             | 3501  | NA            | 0.006         |
| 15    | .             | .             | .             | .             | .             | .             | .             | .             | .             | .             | A             | .            | .             | .             | .             | .             | .             | .             | .             | .             | .             | .             | A            | G             | 3801  | 0.023         | 0.014         |
| 77    | .             | .             | .             | .             | .             | .             | .             | .             | .             | .             | A             | .            | .             | .             | .             | .             | .             | .             | .             | .             | .             | .             | A            | G             | 3503  | 0.006         | 0.014         |
| 36    | .             | .             | .             | .             | .             | .             | .             | .             | .             | .             | A             | .            | .             | .             | .             | .             | .             | .             | .             | .             | .             | .             | A            | G             | 1801  | 0.019         | 0.017         |
| 66    | .             | .             | .             | .             | .             | .             | .             | .             | .             | .             | A             | .            | .             | .             | .             | .             | .             | .             | .             | .             | .             | .             | A            | G             | 5101  | NA            | 0.008         |
| 25    | .             | .             | .             | .             | .             | .             | .             | .             | .             | .             | A             | .            | .             | .             | .             | .             | .             | .             | .             | .             | .             | .             | A            | G             | 2705  | 0.011         | 0.005         |
| 77    | .             | .             | .             | .             | .             | .             | .             | .             | .             | .             | A             | .            | .             | .             | .             | .             | .             | .             | .             | .             | .             | .             | A            | G             | 5501  | 0.009         | 0.009         |
| 16    | .             | .             | .             | .             | .             | .             | .             | .             | .             | .             | A             | .            | .             | .             | .             | .             | .             | .             | .             | .             | .             | .             | A            | G             | 1501  | 0.009         | NA            |
| 7     | .             | .             | .             | .             | .             | .             | .             | .             | .             | .             | A             | .            | .             | .             | .             | .             | .             | .             | .             | .             | .             | .             | A            | .             | 4403  | 0.040         | 0.052         |
| 125   | .             | .             | .             | .             | .             | .             | .             | .             | .             | .             | A             | .            | .             | .             | .             | .             | .             | .             | .             | .             | .             | .             | A            | .             | 1302  | 0.010         | 0.020         |
| 9     | .             | .             | .             | G             | .             | .             | .             | .             | .             | .             | .             | G            | .             | .             | G             | .             | G             | .             | .             | .             | .             | .             | .            | .             | 1501  | 0.012         | 0.020         |
| 11    | .             | .             | .             | .             | .             | .             | .             | .             | .             | .             | .             | G            | .             | .             | G             | .             | G             | .             | .             | .             | .             | .             | .            | .             | 4002  | 0.019         | 0.006         |
| 69    | .             | .             | .             | G             | .             | G             | A             | .             | .             | .             | .             | G            | .             | .             | G             | .             | G             | .             | .             | .             | .             | .             | .            | .             | 1501  | 0.013         | 0.016         |
| 65    | .             | .             | .             | G             | .             | G             | A             | .             | .             | .             | .             | G            | .             | .             | G             | .             | G             | .             | .             | .             | .             | .             | .            | .             | 5101  | 0.020         | 0.022         |
| 40    | .             | .             | .             | G             | .             | G             | A             | .             | .             | .             | .             | G            | .             | .             | G             | .             | G             | .             | .             | .             | .             | .             | .            | .             | 1402  | 0.017         | 0.030         |
| 64    | .             | .             | .             | G             | .             | G             | A             | .             | .             | .             | .             | G            | .             | .             | G             | .             | G             | .             | .             | .             | .             | .             | .            | .             | 4001  | 0.013         | 0.008         |
| 32    | .             | .             | .             | G             | .             | G             | A             | .             | .             | .             | .             | G            | .             | .             | G             | .             | G             | .             | .             | .             | .             | .             | .            | .             | 3501  | 0.018         | 0.026         |
| 78    | .             | A             | .             | .             | .             | G             | G             | A             | .             | .             | A             | .            | .             | A             | .             | .             | .             | .             | .             | .             | .             | .             | .            | .             | 3701  | 0.014         | 0.006         |
| 85    | .             | A             | .             | .             | .             | G             | G             | A             | .             | .             | A             | .            | .             | .             | .             | .             | .             | .             | .             | .             | .             | .             | A            | .             | 5201  | 0.009         | 0.006         |
| 70    | C             | A             | .             | .             | .             | .             | .             | .             | .             | .             | A             | .            | .             | .             | .             | .             | .             | .             | .             | .             | .             | .             | A            | .             | 4901  | 0.006         | 0.006         |

The alternate gray and white cells in the first column indicates the seven common super-haplotypes of the tumor necrosis factor alpha block reported earlier (27) for non-Hispanic Caucasian men sampled for a case and control study of HIV-related Kaposi's sarcoma (HIV-KS) in the Multicenter AIDS Cohort Study.

Supplementary Figure S1

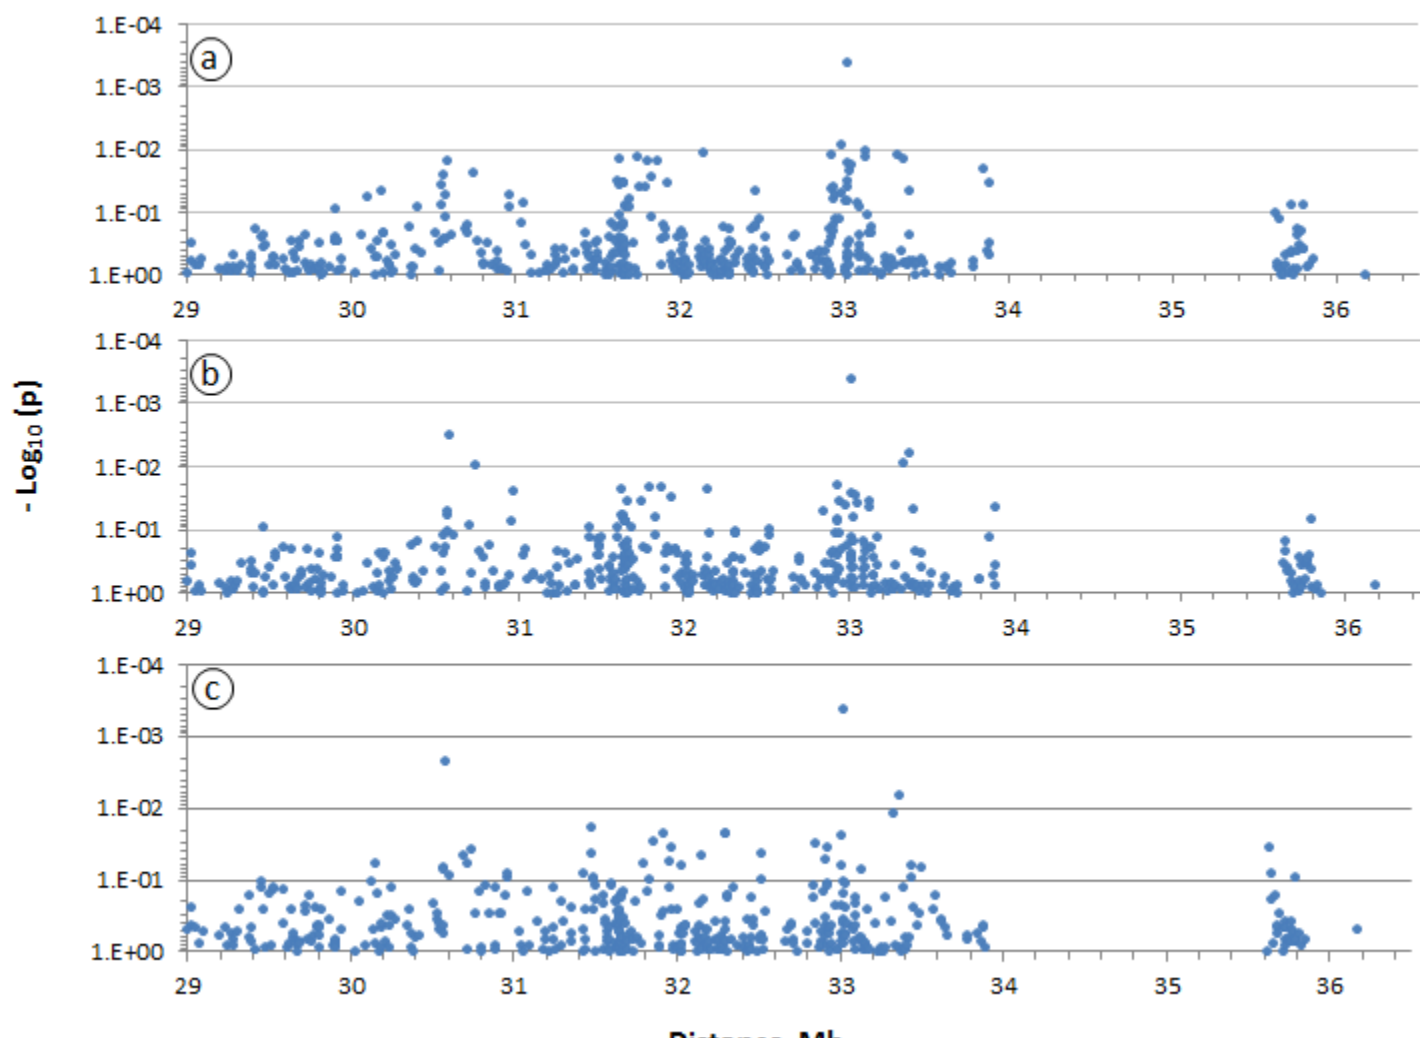

## Supplementary figure legends

Figure S1. Association of major histocompatibility complex (MHC) polymorphisms with HIV-related Kaposi's sarcoma (HIV-KS) in men . The figure shows the strength of the association expressed as minus logarithm decimal of the p-value ( $-\text{Log}_{10}(p)$ ) obtained from univariate analyses of 467 single nucleotide polymorphisms (SNP) spanning about 5 megabases across central and extended MHC. The association with the KS outcome was evaluated in conditional logistic models assuming additive (a), dominance (b) or overdominance (c) variance and controlling for the effects of age at baseline, degree of immunosuppression (calculated as the area under the curve of CD4+ T-cell count below 300), the rate of CD4+ T-cell count change measured at six month-intervals (slope of CD4+ T-cell count from the time of dual seroconversion to HIV-1 and HHV8) and for the effects of two HLA-B alleles (B\*2705 and B\*1401) significantly ( $p < 5\%$ ) associated with KS. Panel (a) is a sensitivity analysis restricted to non-Hispanic Europeans, which are by far the predominant race group in the study population.
